# Supplementary material
Source: PubMed Central journal article supplement (PMC7375762)
Supplement: IAI.00163-20-s0001.pdf [file IAI.00163-20-s0001.pdf]

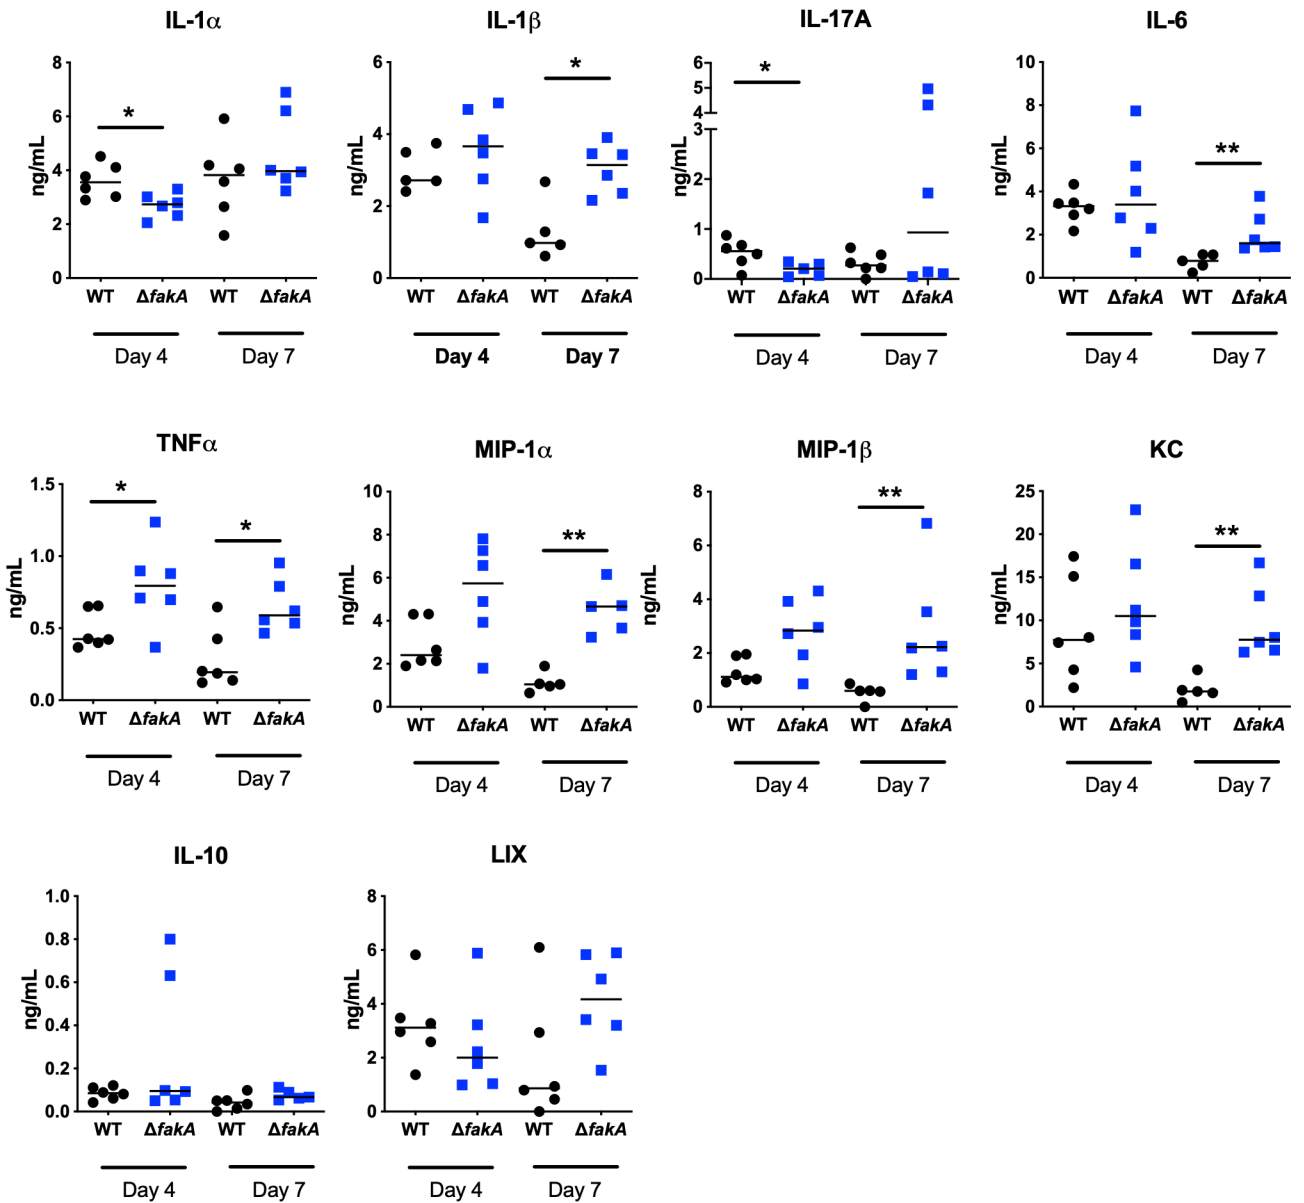

**Figure S1. Alternate presentation of cytokine data.** Mice were subcutaneously infected with  $1-3 \times 10^7$  CFUs of WT or  $\Delta fakA$  *S. aureus*. Mice were sacrificed 4 or 7 days p.i.. Infection site skin was collected and cytokine levels measured in homogenate. Dots indicate an individual mouse, whereas bars indicate the median of  $n=6$ . \* $p < 0.05$ ; \*\* $p < 0.01$  by Mann-Whitney test using GraphPad Prism Ver. 8. Some additional cytokines (LIX and IL-10) are included.
